# Supplementary material
Source: HighWire-hosted journal article supplement (https://erj.ersjournals.com/content/52/5/1801074)
Supplement: inline-supplementary-material-2 [file inline-supplementary-material-2.pdf]

## Study 1: Flow of patients

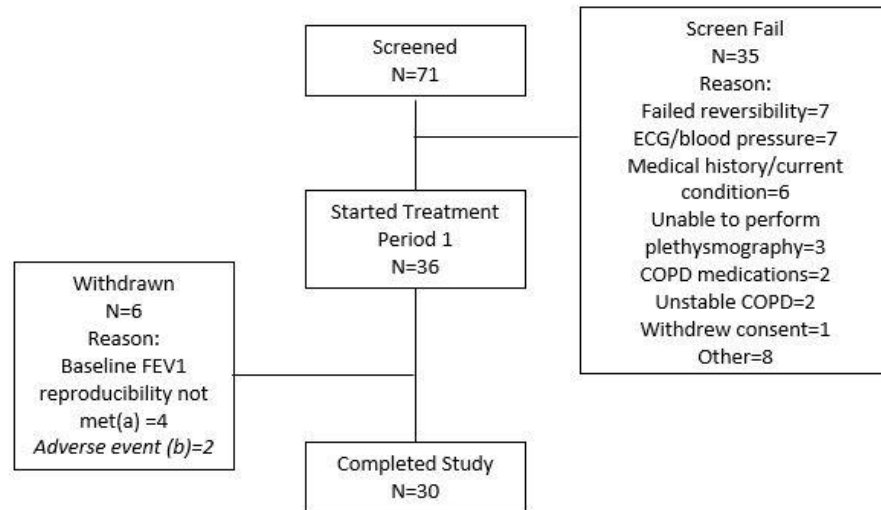

### Abbreviations:

COPD=chronic obstructive pulmonary disorder

ECG= electrocardiogram

FEV1=forced expired volume in 1 second

(a) Pre-dose FEV1 not within 15% of the Visit 2 value at Visit 3 to 7 (to ensure consistent baseline for all treatments)

(b) Both were COPD exacerbations

## Study 2: Flow of patients

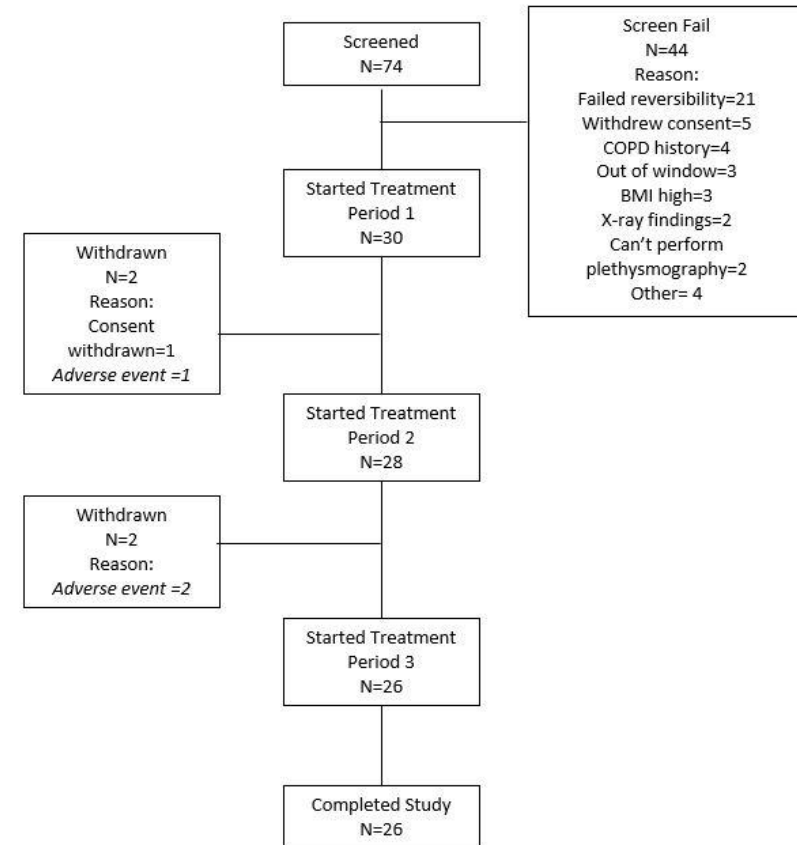

### Abbreviations:

BMI=body mass index

COPD=chronic obstructive pulmonary disorder
